# Supplementary material
Source: MDPI journal article supplement (https://www.mdpi.com/2313-0105/8/8/88)
Supplement: s1 [file s1]

# Development of an innovative procedure for lithium plating limitation and characterization of 18650 cycle aged cells for DCFC automotive applications

Matteo Dotoli <sup>1,2,\*</sup>, Emanuele Milo <sup>3,\*</sup>, Mattia Giuliano<sup>2</sup>, Arianna Tiozzo <sup>1,2</sup>, Marcello Baricco <sup>1</sup>, Carlo Nervi <sup>1</sup>, Massimiliano Ercole <sup>3</sup> and Mauro Francesco Sgroi <sup>1,\*</sup>

<sup>1</sup> MJL, MEMT, Centro Ricerche Fiat S.C.p.A, Orbassano, 10043 Turin, Italy

<sup>2</sup> Department of Chemistry, NIS-INSTM-University of Turin, 10125 Turin, Italy

<sup>3</sup> Propulsion Systems, FCA Italy SPA, Corso Settembrini 40, 10135 Turin, Italy

\* Correspondence: matteo.dotoli@unito.it (M.D.); emanuele.milo@stellantis.com (E.M.); mauro.sgroi@crf.it (M.F.S)

## Supplementary Materials

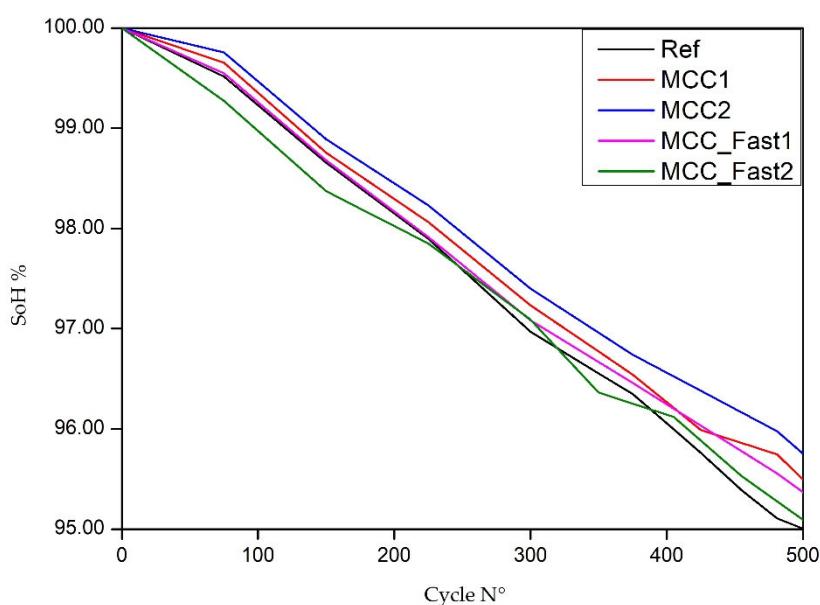

Figure S1 - Cycle aging campaign up to 500 cycles

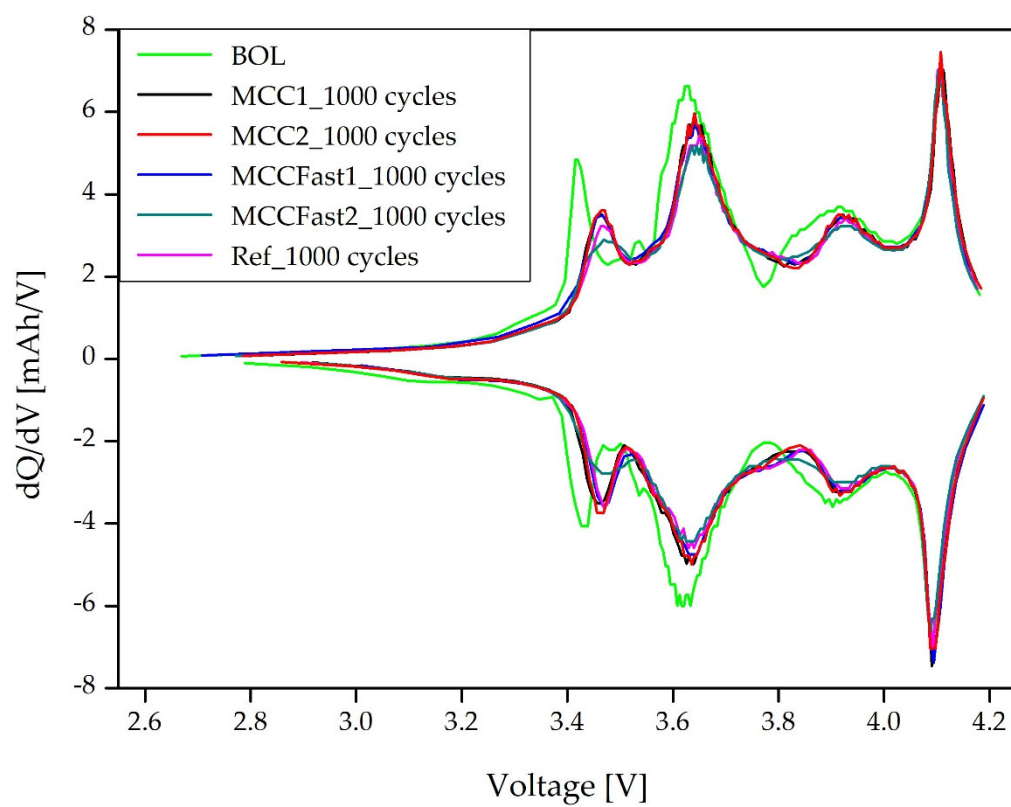

Figure S2 - Incremental capacity analysis comparison

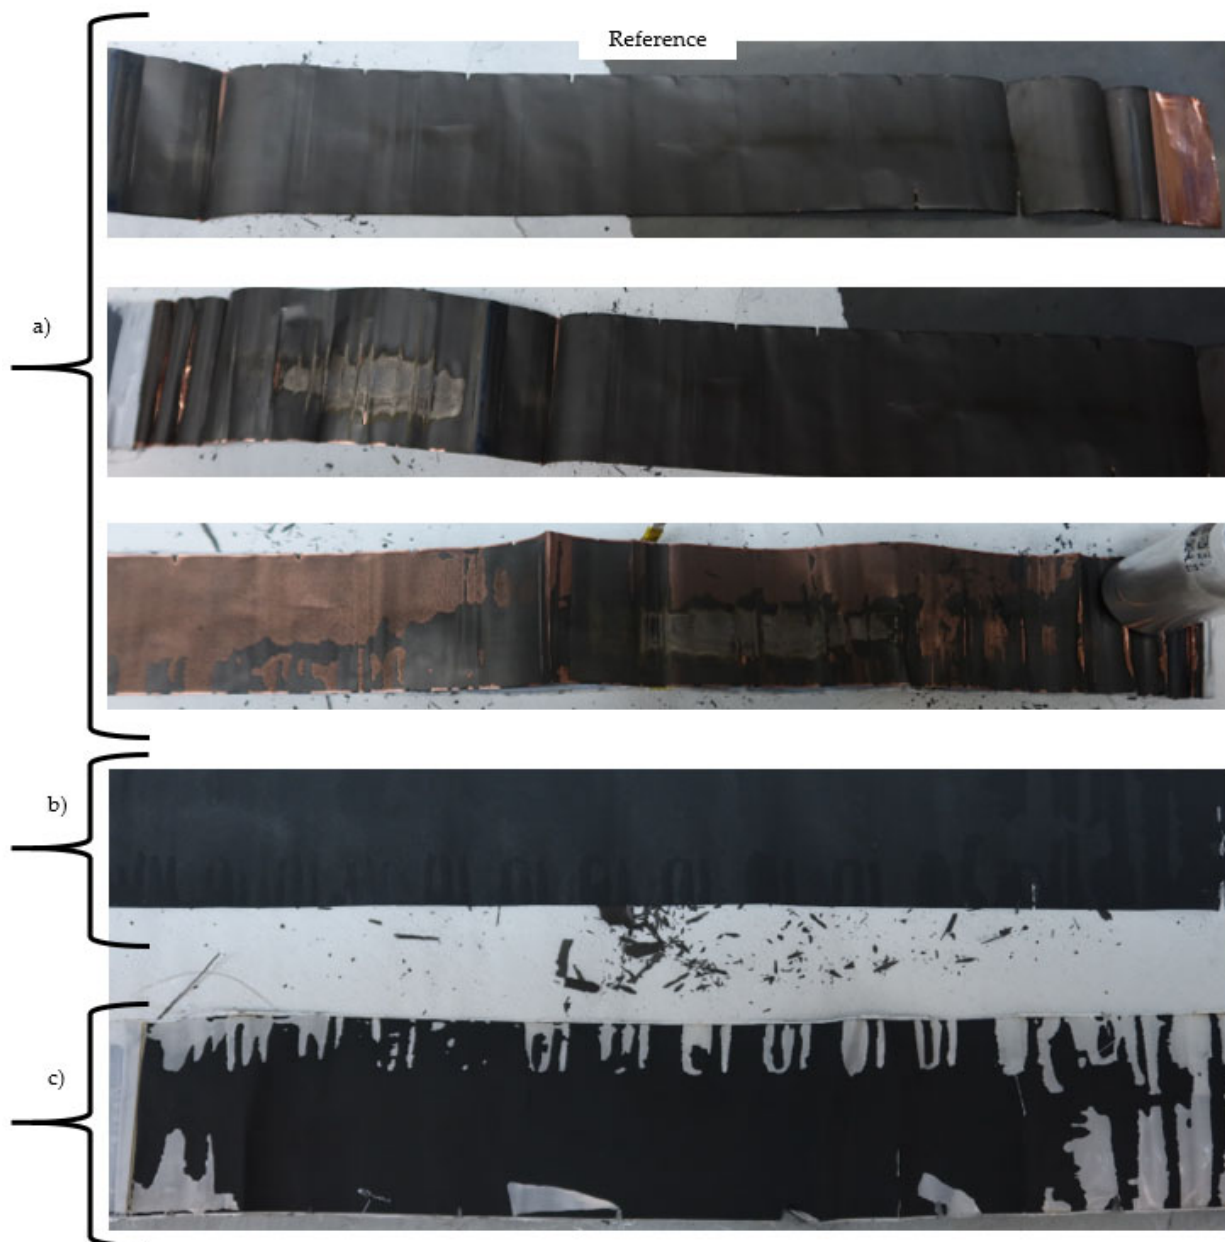

Figure S3 - Reference DCFC profiles Post-mortem visual inspection for a) anode; b) cathode; c) separator

MCC1

a)

b)

Figure S4 - MCC1 DCFC profiles Post-mortem visual inspection for a) anode; b) cathode; c) separator

MCC2

a)

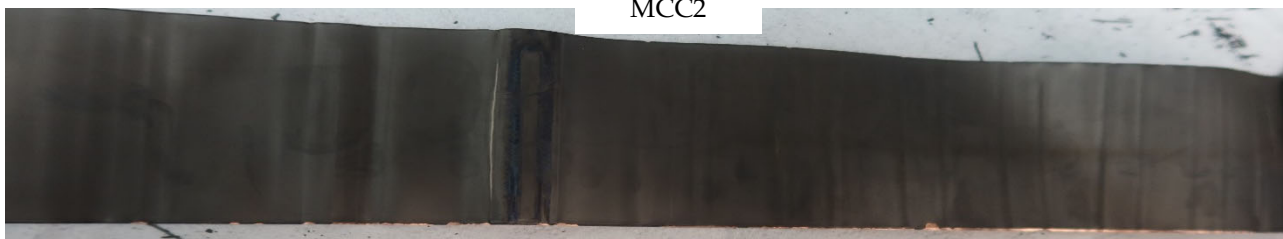

b)

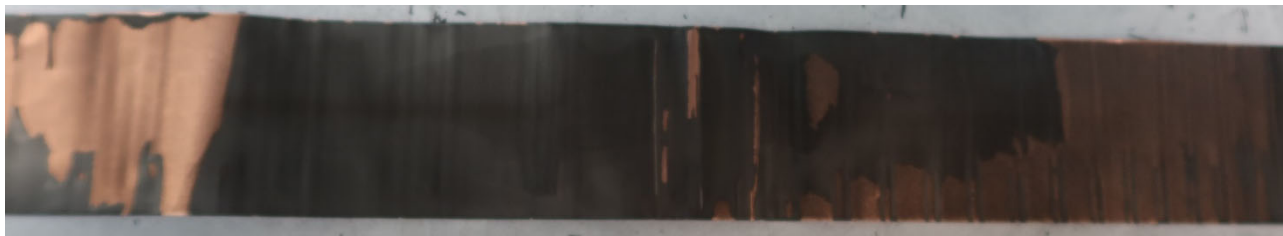

c)

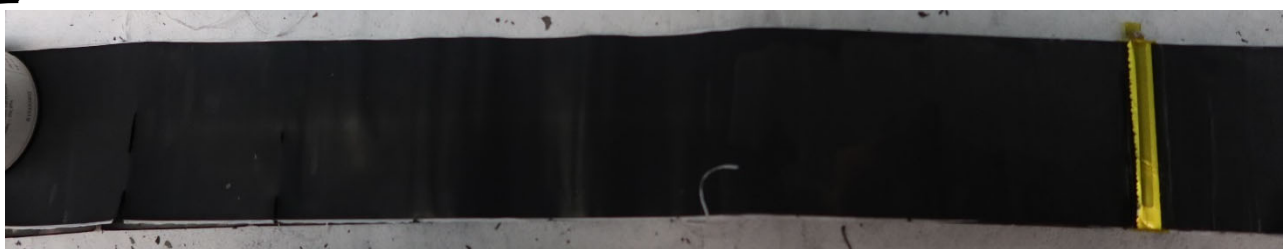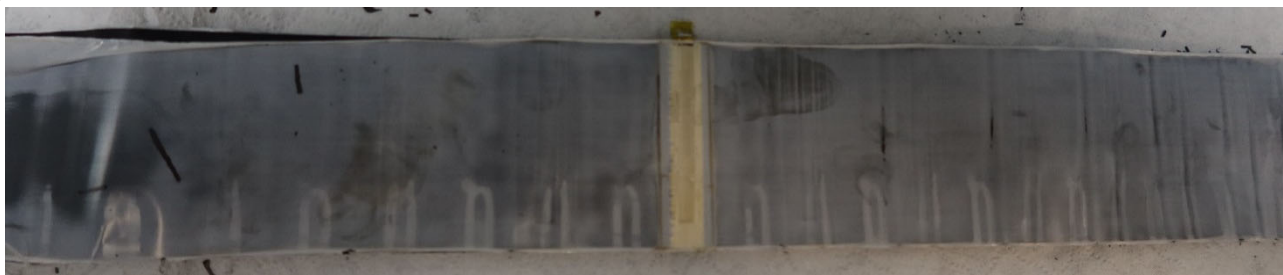

Figure S5 - MCC2 DCFC profile Post-mortem visual inspection for a) anode; b) cathode; c) separator

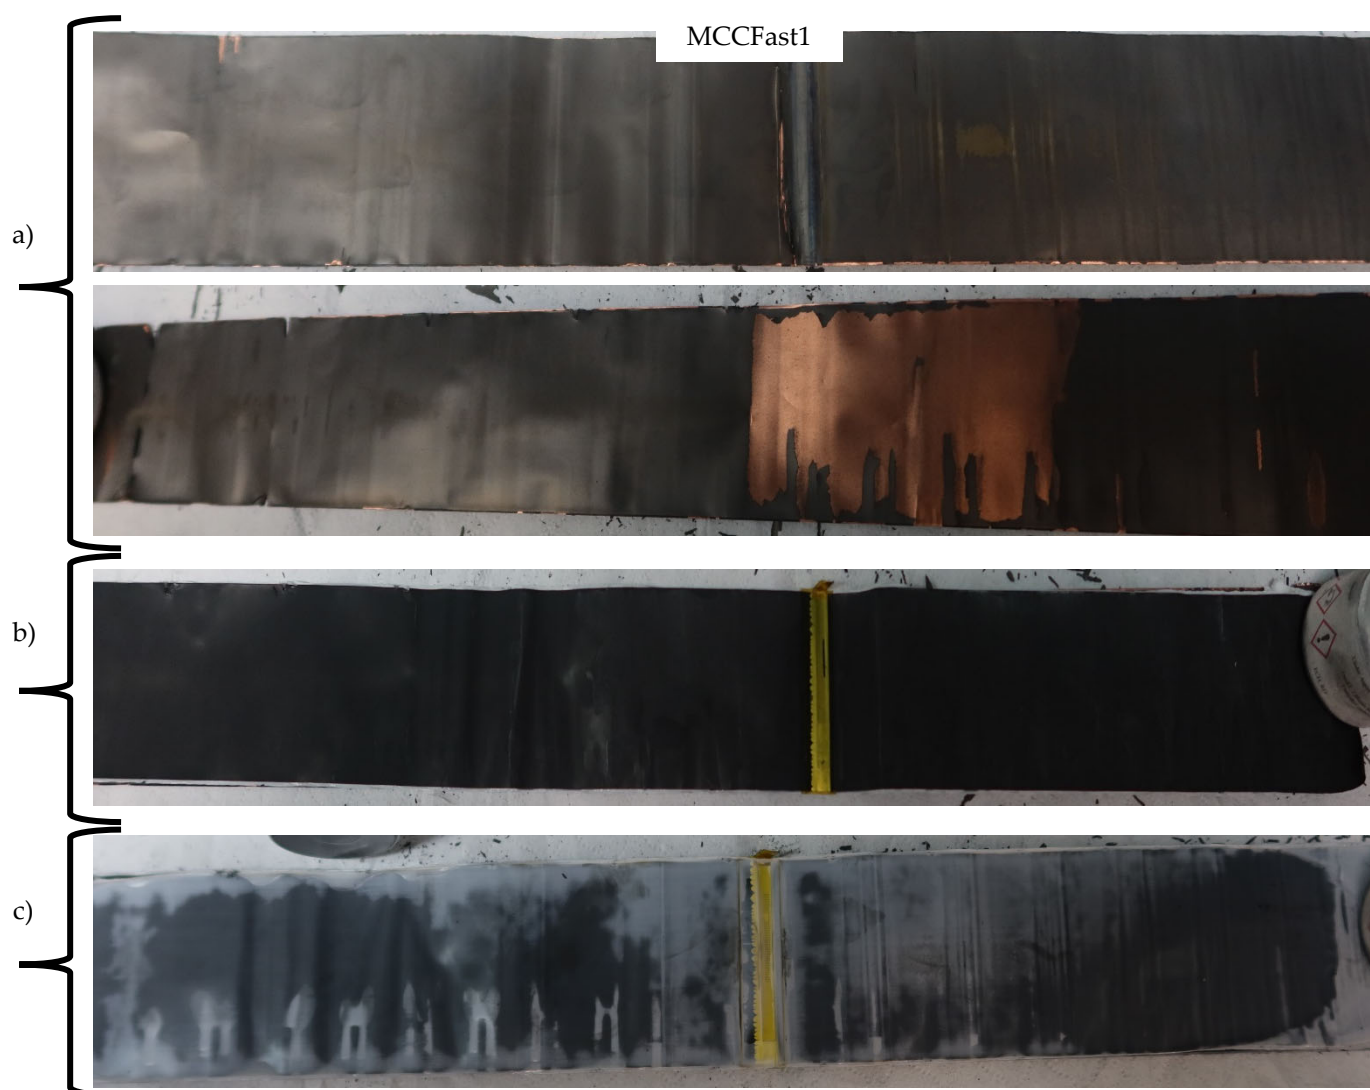

Figure S6 - MCCFast1 DCFC profile Post-mortem visual inspection for a) anode; b) cathode; c) separator

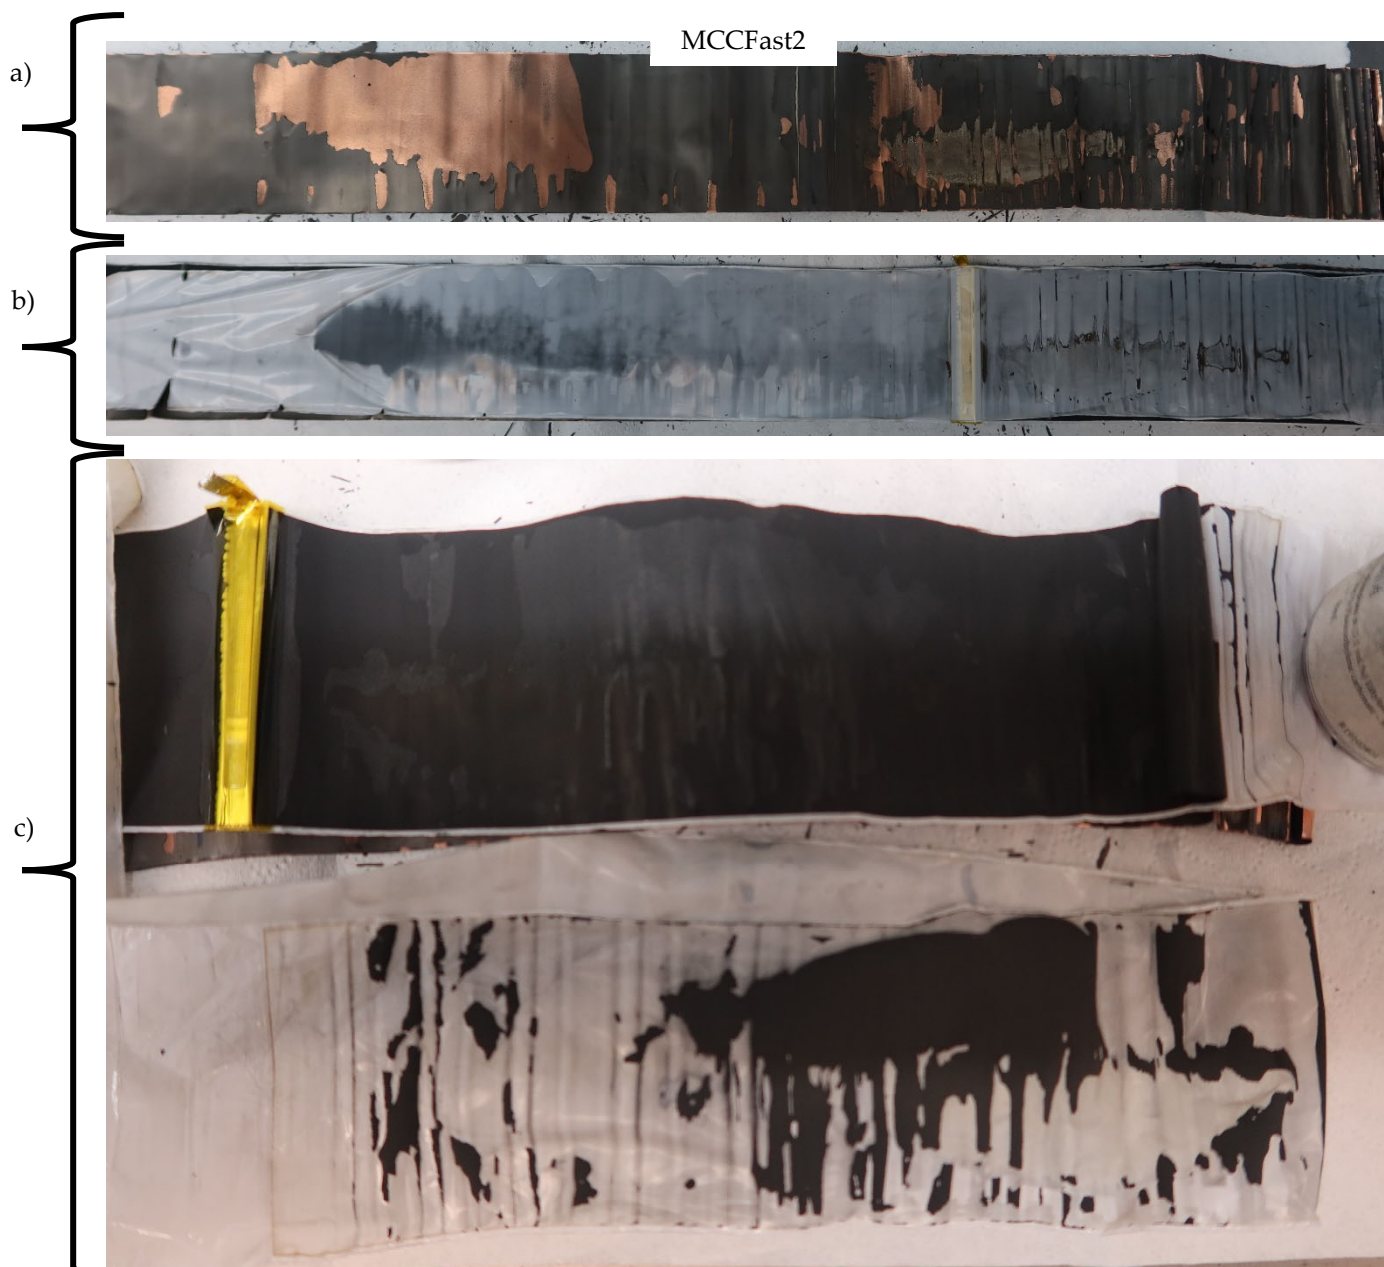

Figure S7 - MCCFast2 DCFC profile Post-mortem visual inspection for a) anode; b) cathode; c) cathode and separator

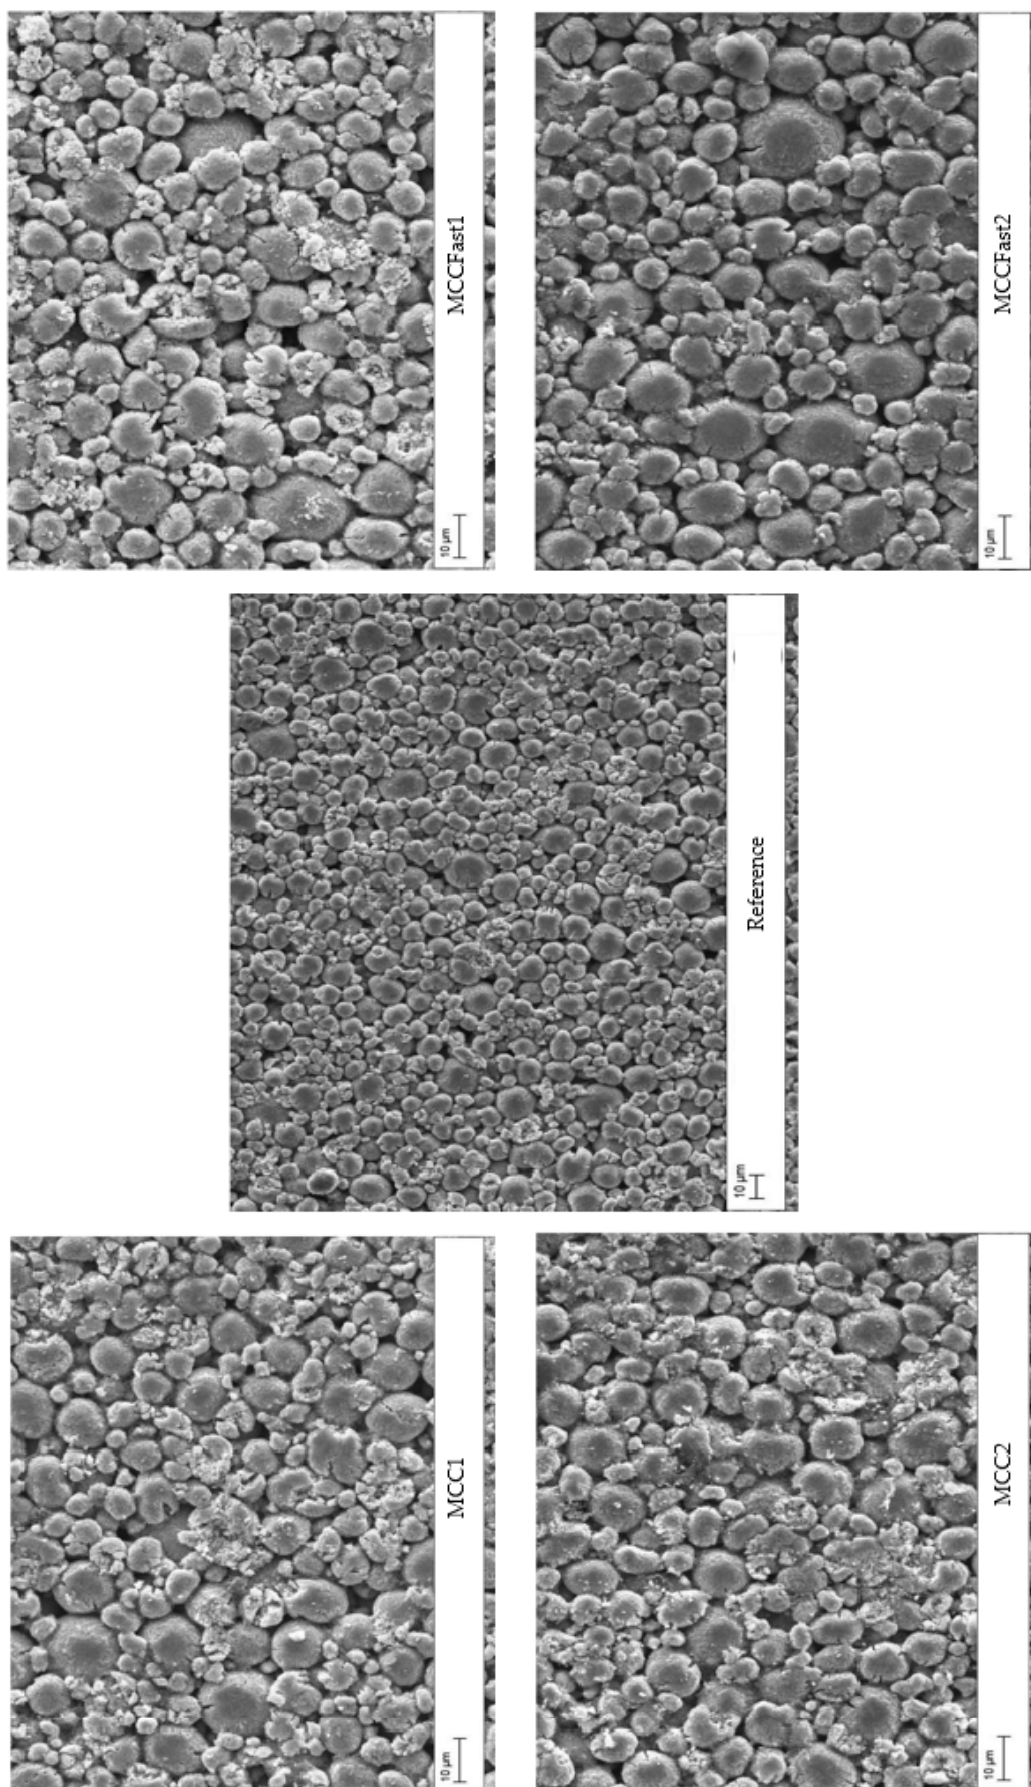

Figure S8 - SEM images for NMC811 for the five DCFC profiles

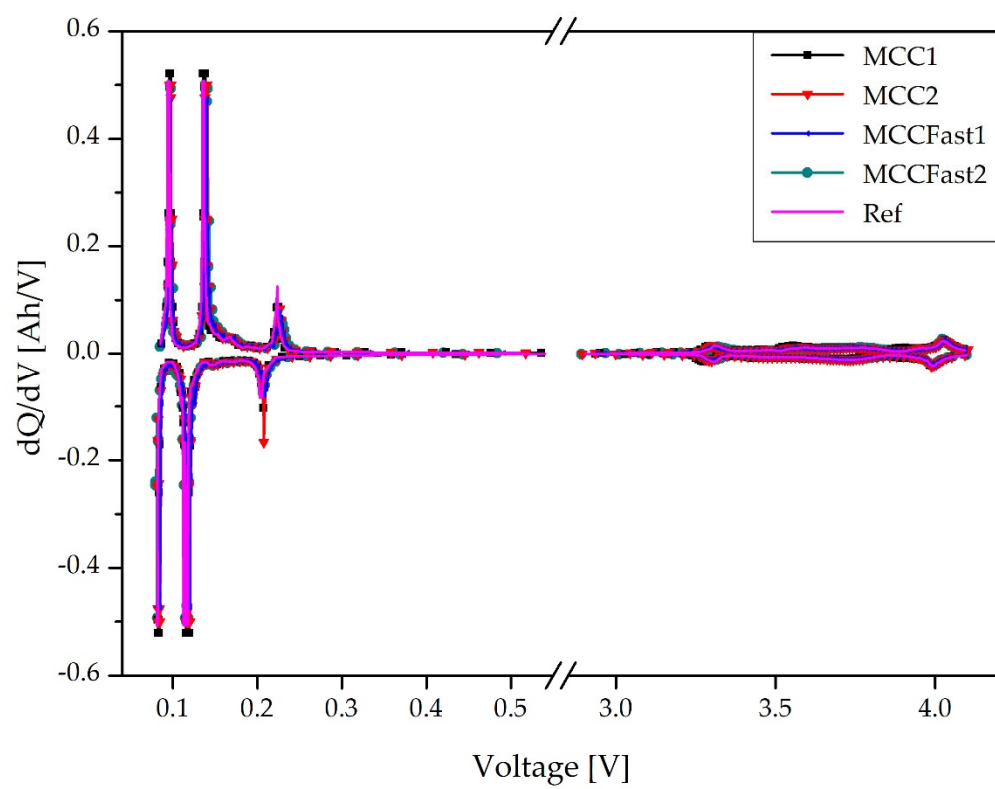

Figure S9 - Three electrode measurement for all the implemented DCFC profiles

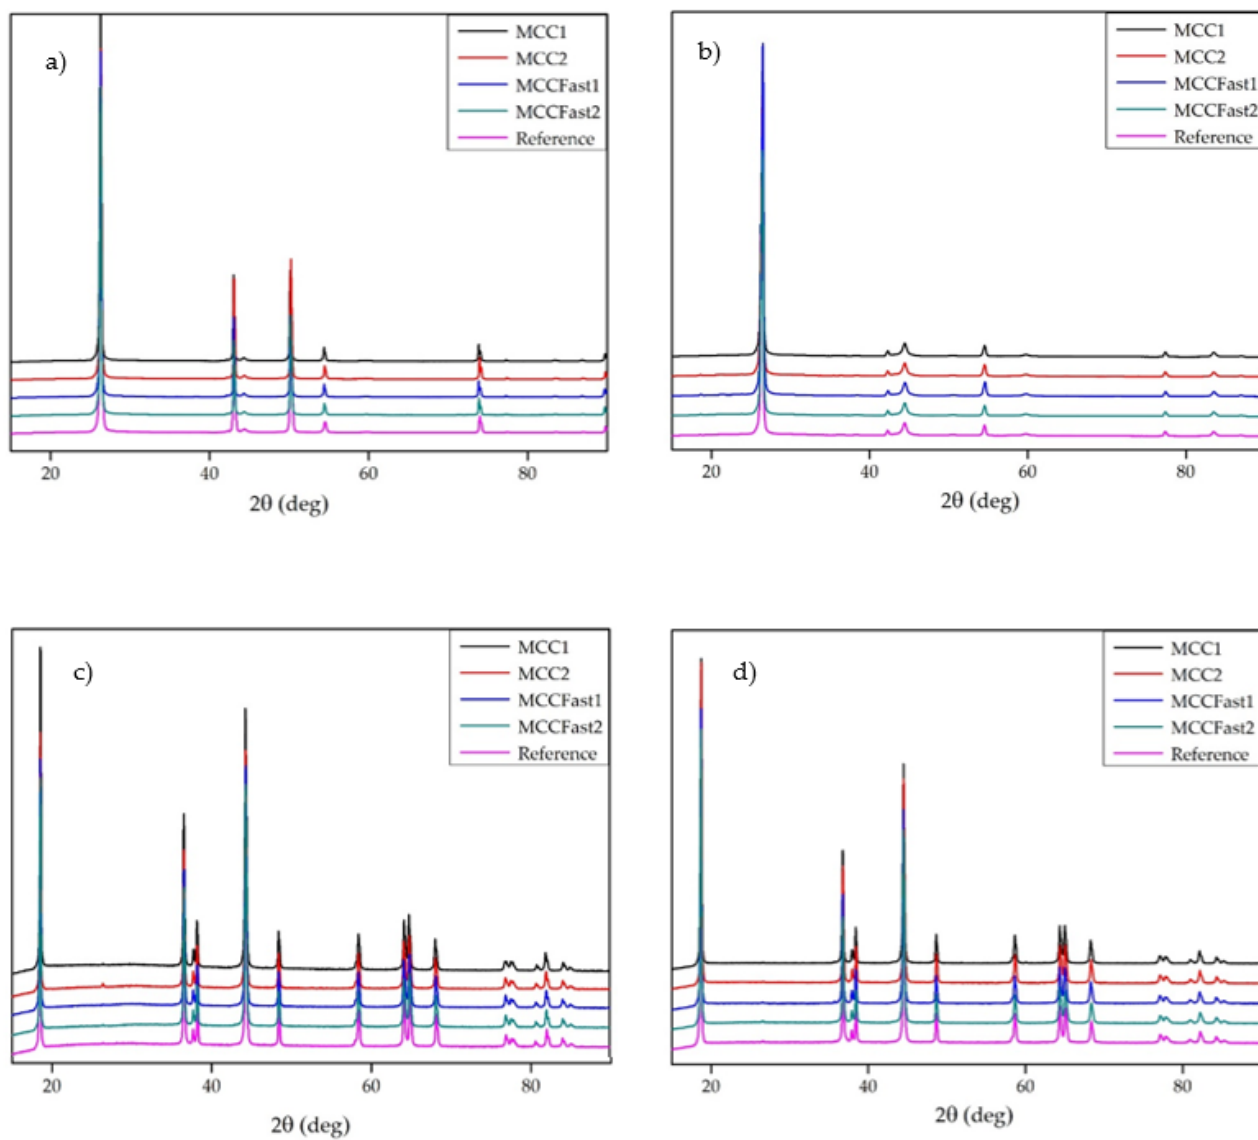

Figure S10 - XRD pattern of a) Si-C calendered; b) Si-C powders; c) NMC811 calendered; d) NMC811 powders

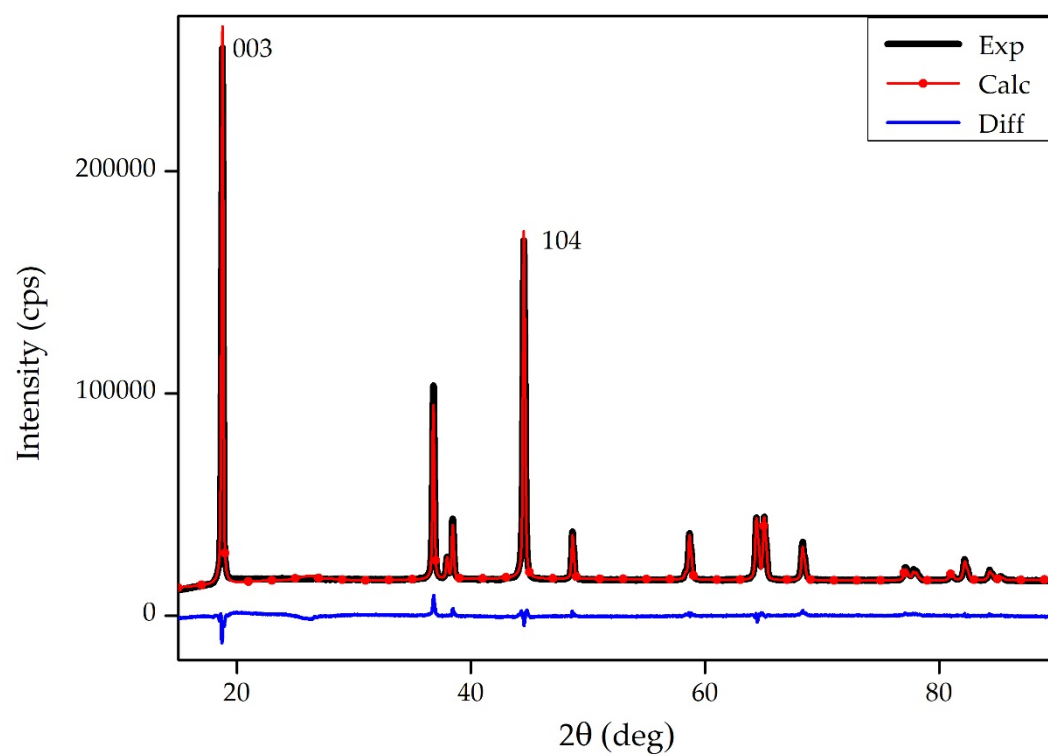

Figure S11 - XRD for NMC811 pattern with Rietveld refinement

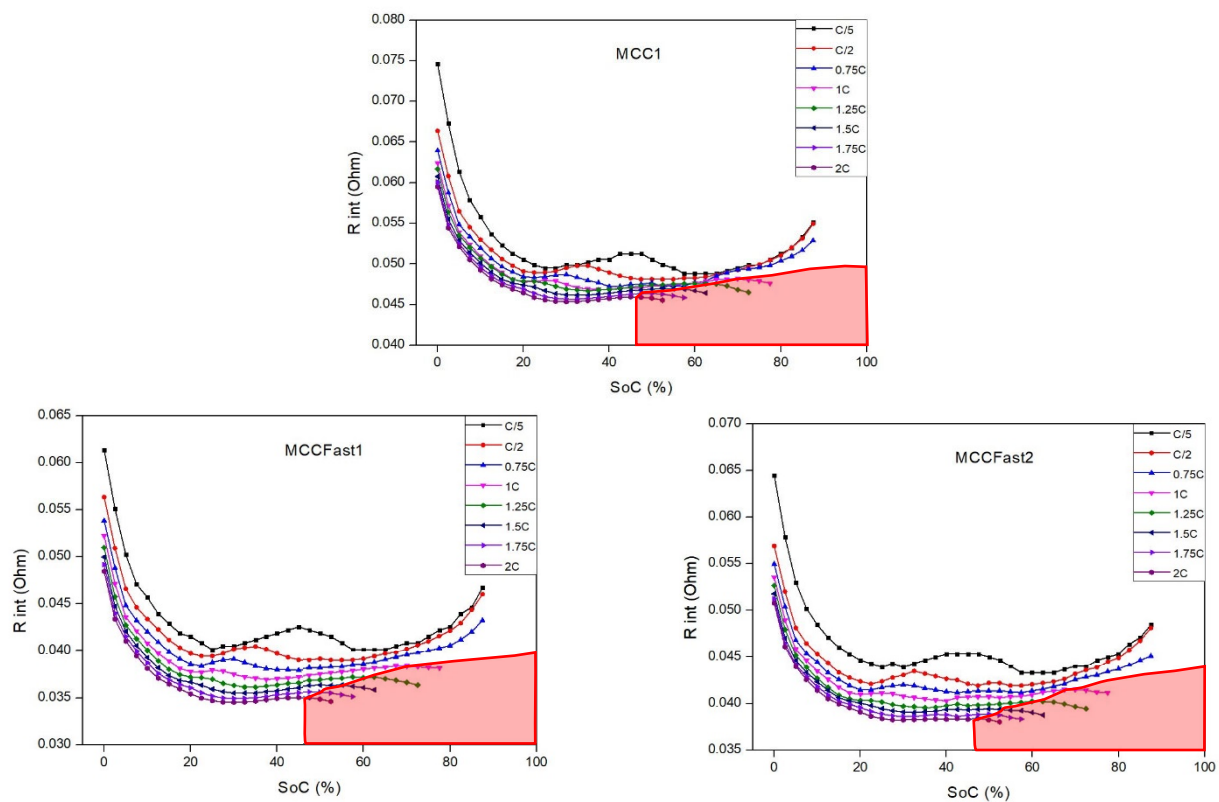

Figure S12 - Internal Resistance Measurements
